# Supplementary material for: Sleep is not just for the brain: transcriptional responses to sleep in peripheral tissues
Source: PubMed Central journal article supplement (PMC3701596; doi:10.1186/1471-2164-14-362), 2013-05-30

**Lung: 3 Hours**

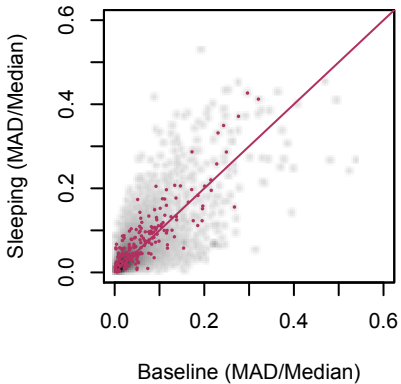

**Lung: 6 Hours**

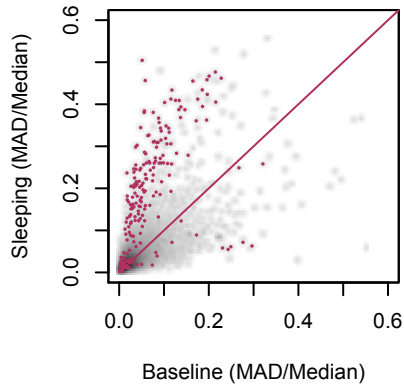

**Lung: 9 Hours**

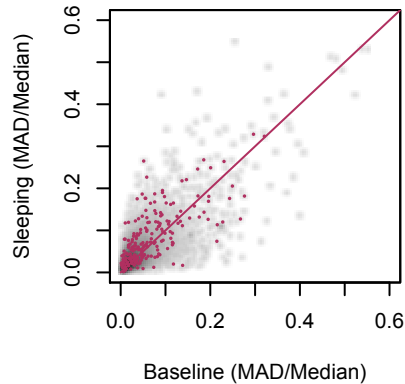

**Lung: 12 Hours**

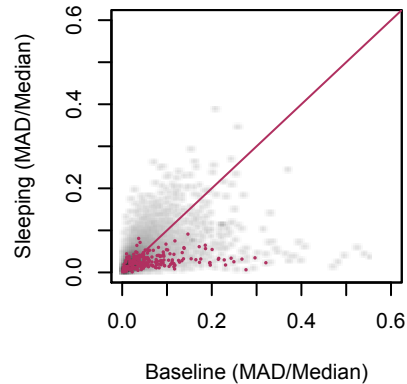

Supplement: 1471-2164-14-362-S3.pdf [file 1471-2164-14-362-S3.pdf]
